# Supplementary material for: Comparison of the abilities of universal, super, and specific DNA barcodes to discriminate among the original species of Fritillariae cirrhosae bulbus and its adulterants
Source: PubMed Central journal article supplement (PMC7018091; doi:10.1371/journal.pone.0229181), 2020-02-13
Supplement: pone.0229181.s001.pdf [file pone.0229181.s001.pdf]

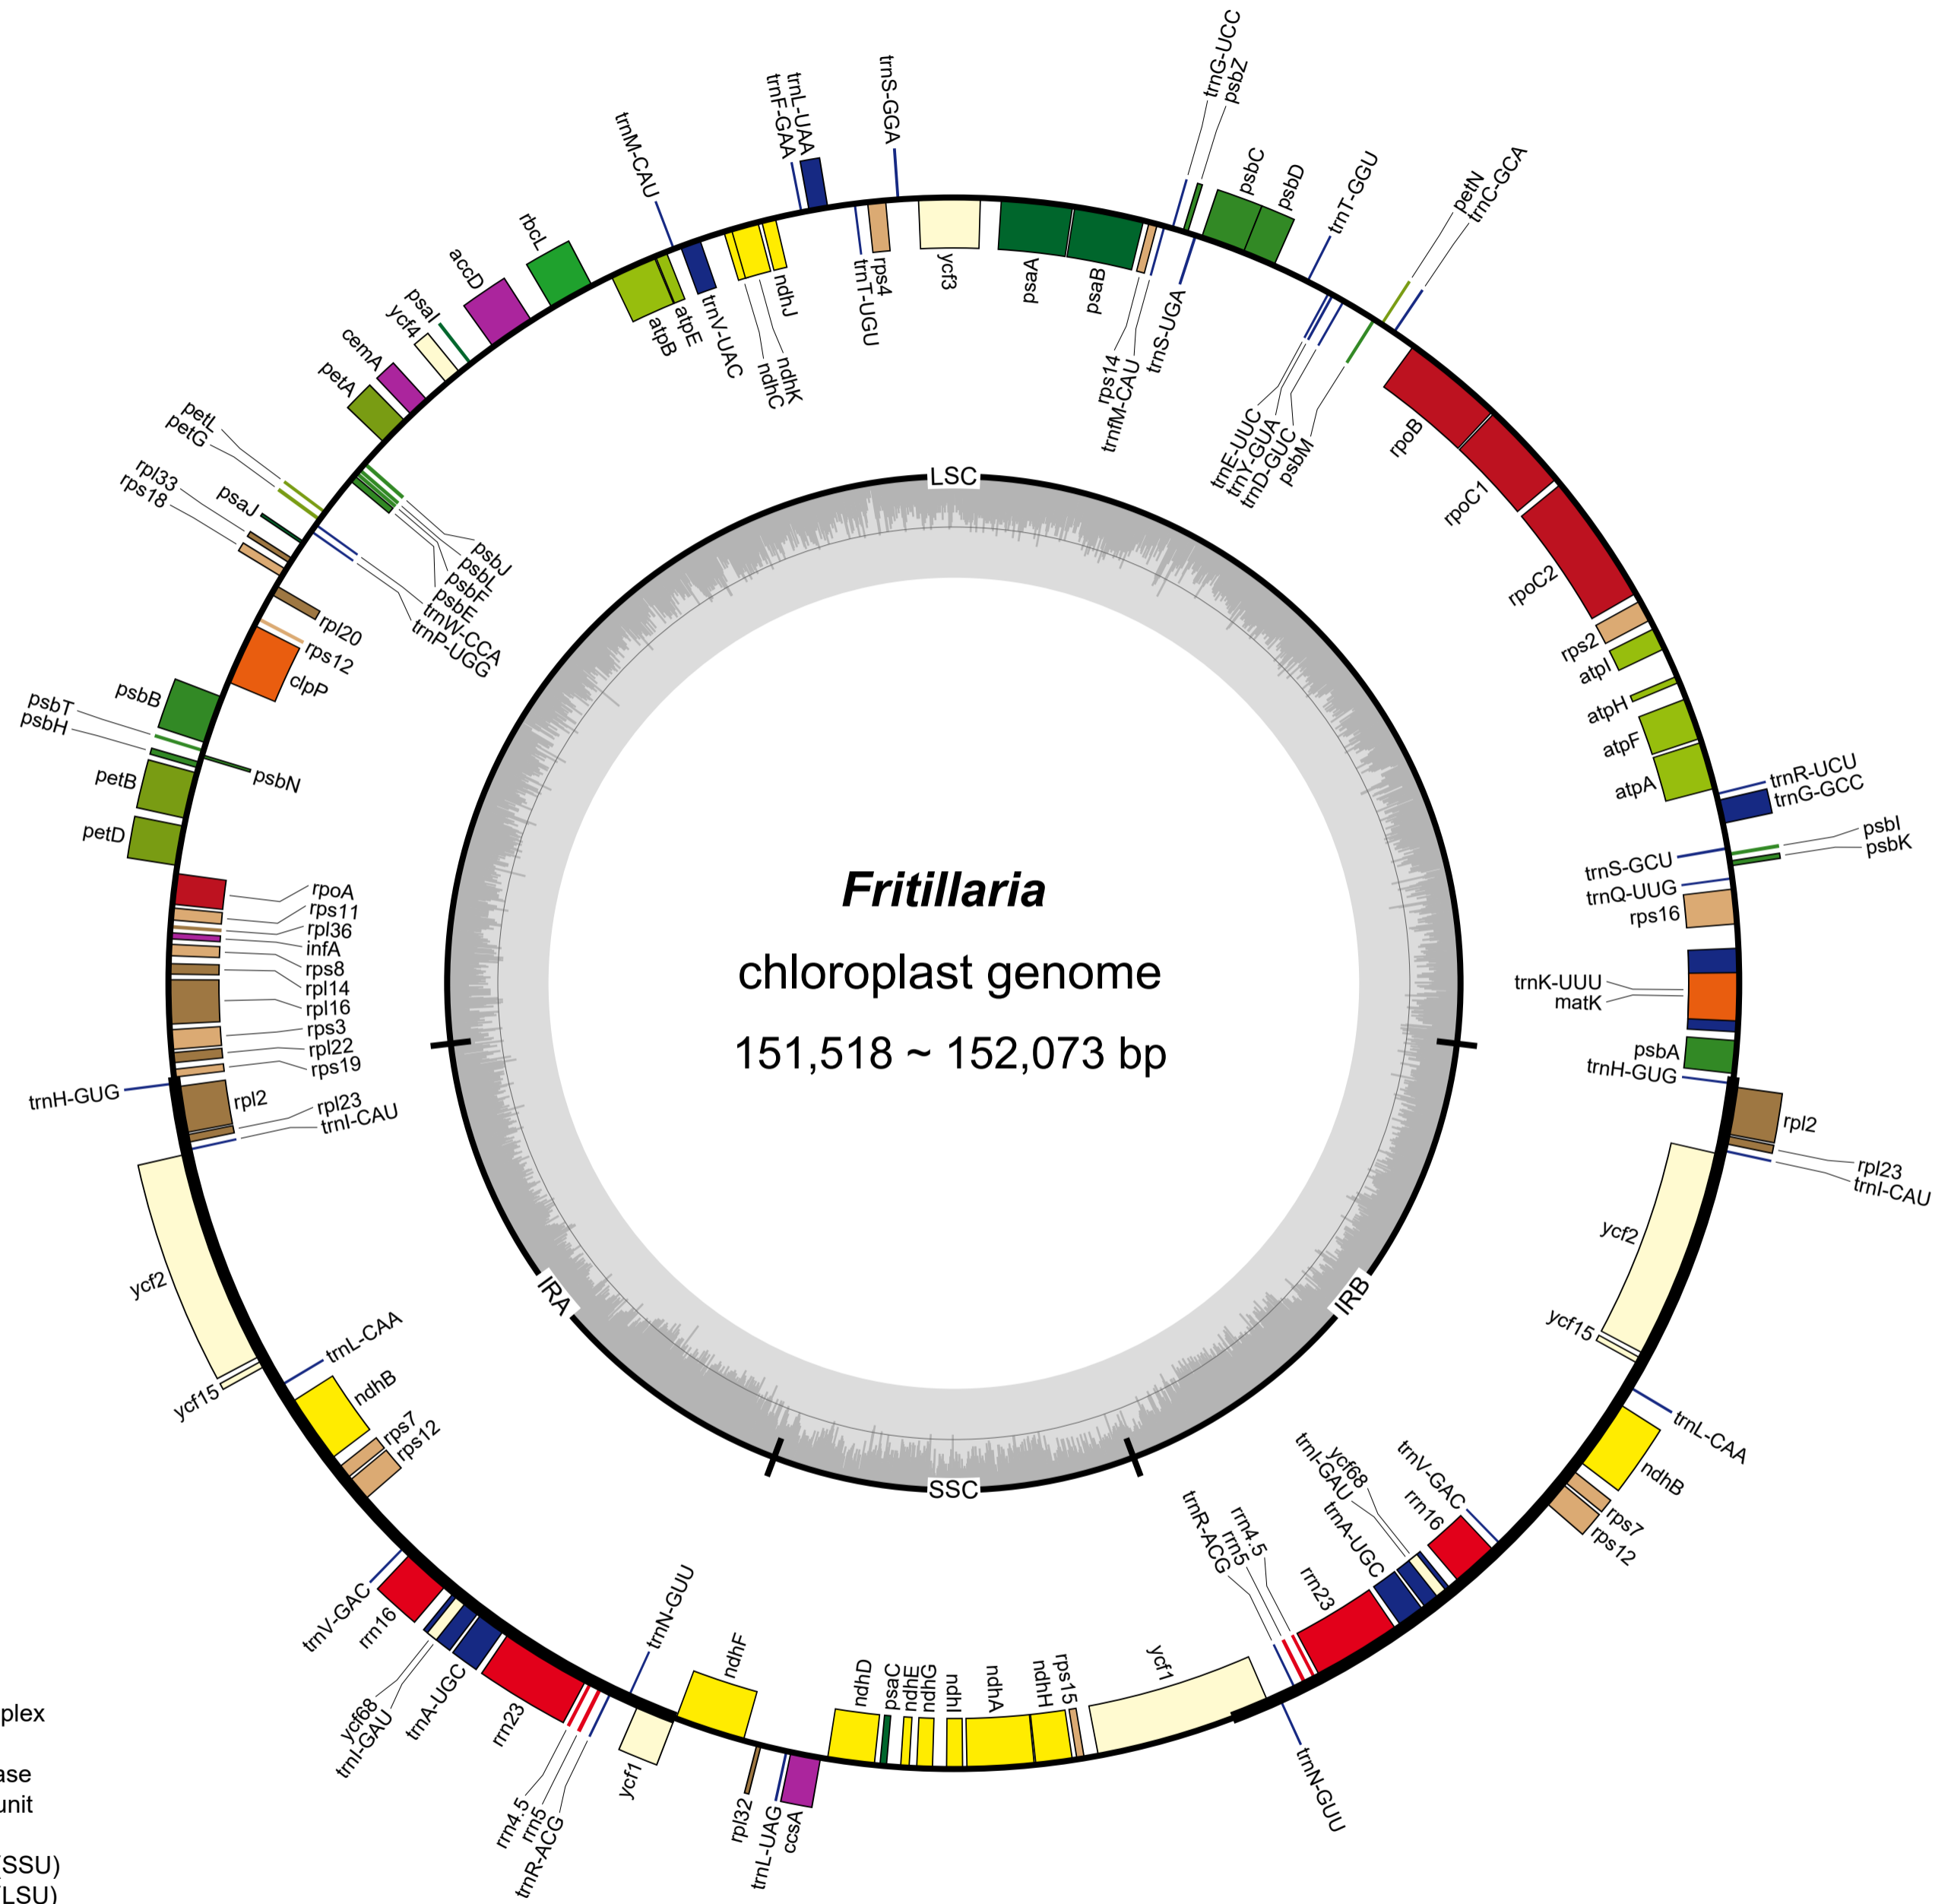

**Fritillaria**  
chloroplast genome  
151,518 ~ 152,073 bp

- photosystem I
- photosystem II
- cytochrome b/f complex
- ATP synthase
- NADH dehydrogenase
- RubisCO large subunit
- RNA polymerase
- ribosomal proteins (SSU)
- ribosomal proteins (LSU)
- clpP, matK
- other genes
- hypothetical chloroplast reading frames (ycf)
- ORFs
- transfer RNAs
- ribosomal RNAs
- origin of replication
- introns
- polycistronic transcripts
