# Supplementary material for: Comparison of the abilities of universal, super, and specific DNA barcodes to discriminate among the original species of Fritillariae cirrhosae bulbus and its adulterants
Source: PubMed Central journal article supplement (PMC7018091; doi:10.1371/journal.pone.0229181), 2020-02-13

*ndhD*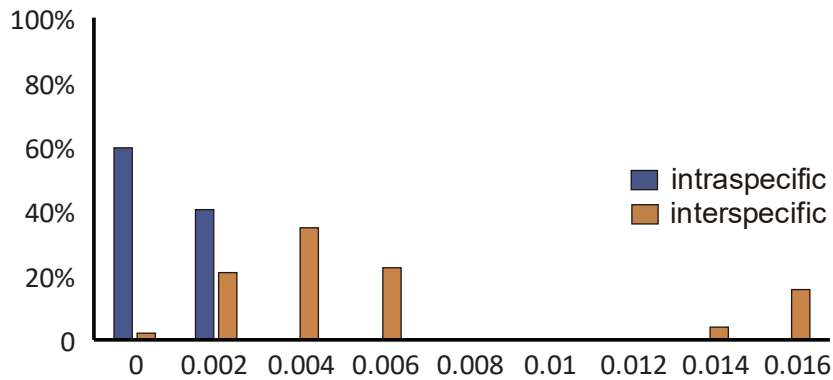*ycf1*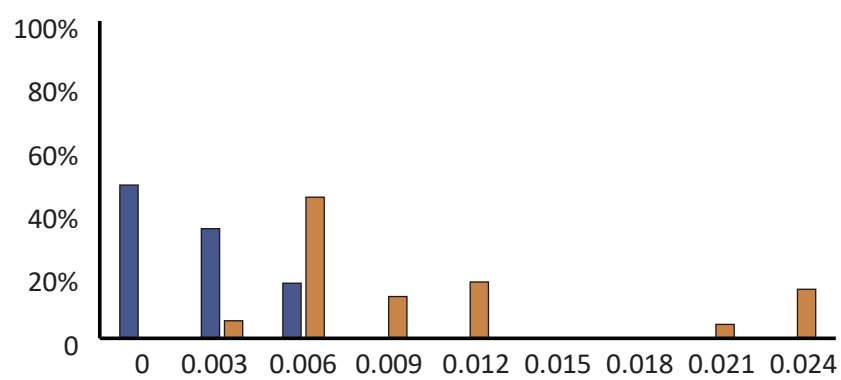*rps4-trnL-UAA*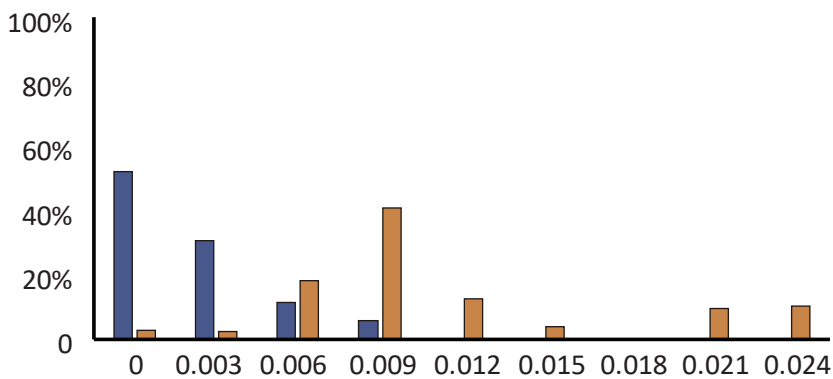*psbM-psdD*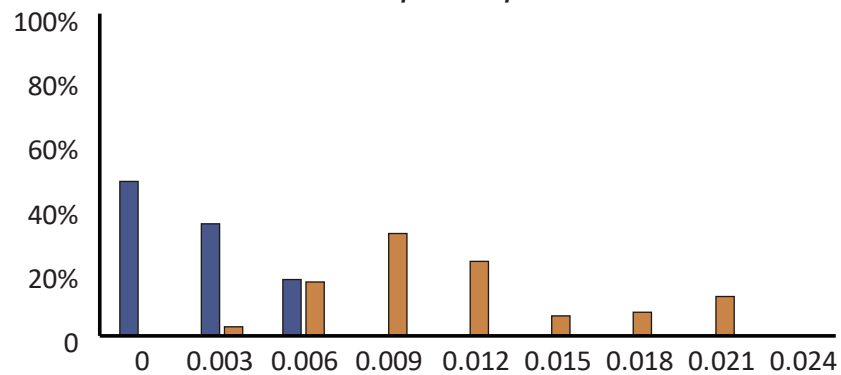*ndhF-trnL-UAG*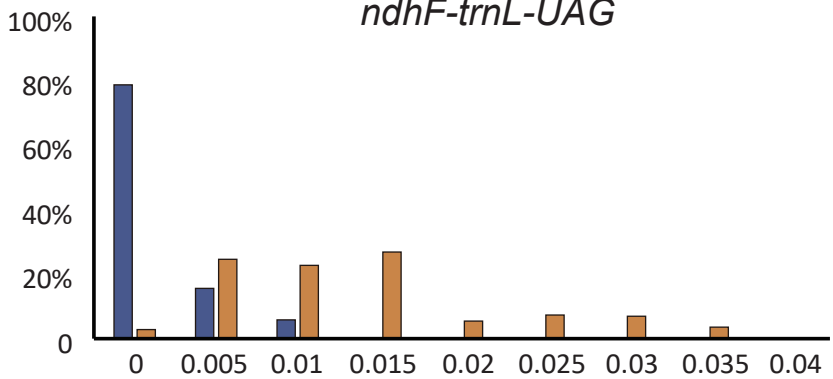*petB-intron*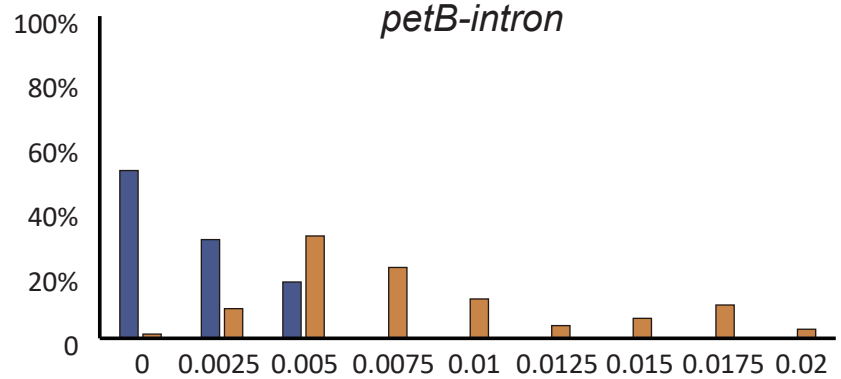

Supplement: pone.0229181.s002.pdf [file pone.0229181.s002.pdf]
